# Supplementary material
Source: PubMed Central journal article supplement (PMC1892957)
Supplement: pnas_0608797104_2.pdf [file pnas_0608797104_2.pdf]

*dgpB* - AAACGACTAGTTTAAA **CGAA** GGTTTTAATCTTGCGTTTTTATAAGGGGTAAATAGAAA - GGTTTGTGTAAGGA  
*dgpC* - AAACGACTAGTTTAAA **CGATCGTCTAAATCTTGCGTTTT**TGAG - CGTCGAAACGGGA - GGTTTCGTTGAAGGA  
*dgpD* - AAACGGCTAGTCTAAA **CGATCGTTTAGATCTTGCGTTTT**TTAGACGCTTGAGAGGGA - GGTTTCGTTGAAGGA  
*dgpF* **AAAACGACTAGTTTAAA** **CGATCGTCTAAATCTTGCGTTTT**TTCAAGGGATAAAGGAGAA - GGTTTGTTTATGGA  
*dgpG* - AAACGACTAGTTTAAA **CGATCGTCTAGATTAGTCGTTTT**TTAAGGGAGGAAAAGAGA - GGTTTCGTTTACGGA  
*dgpH* - AAACGACTAGTTTAAA **CGATCGTCTAGATCTTGCGTTTT**TTAAGGGGTAAAAAGAATGGTTTCGTGAAAGGA  
*dgpI* **AAAACGGCTAGTATAAAA** **CGATC** GTTTAGATCTTGCGTTTTTTGAAGAGAGAAAACGGGA - GGTTTGTTTACGGA  
 \*\*\*\*\* \*\* \* \*\* \*\*\*\*\* \* \* \* \* \* \*\* \*\* \* \*\*

*dgpB* ATCGCTTGTTTCGTAAAGGATAACCTATCCTATTGATAAGAAAGAGAATAAGCAGT - AAAAAAATAGCCCGGA  
*dgpC* ATCGCTTGTTTCGTGAAGGATAACCTATCCTATTGATAAGAAAGAGAATAAGCGAT - AAAAAAATCGTCTGGA  
*dgpD* ATCGCTTGTTTCGTAAATGATAACCTATCCTATTGATAAGAAAGAGGATAAGTGAA - AAAAAAATAGCTCGGA  
*dgpF* ATCGGTTGTTTCGTGATGGATAGCCTATTTGATTGATAAGAAAGCGGATAAGGGGTGATTTTTTTAACCCTTGA  
*dgpG* ATCGCTTGTTTCGTAAACGGATAGCCTATTTGATTGATAAGAAAGAGGATAAGGGGTGAAAAAATAGCCCGGA  
*dgpH* ATCGGCTGTTTCGTAAACGGATAGCCTATTTGATTGATAAGAAAGAGGATAAGGGGTGAAAAAATAGCTCAGA  
*dgpI* ATCGGTTGTTTCGTAAAGGATAGGCTATCCTATTGATAAGAAAGCGAATAAGGGATGAAAAAATAGCTCGGA  
 \*\*\*\*\* \*\* \* \*\* \*\*\*\*\* \*\* \*\*\*\*\* \* \*\*\*\*\* \* \* \*\*\*\*\*

**TtTG**

**TANNTTGY**

*dgpB* AGGGTTGCAAGTATCGAAGAAACGCGTACCTTTGCAAATGACTAAAAGAATCG **TTTCGTTTAAACTAGTCGTTT** -  
*dgpC* AGGGTTGCAAGTATCGAAGAAATGCGTACCTTTGCAAATGACTAAAAGAAT **CGATCGTTT**TAGACTAGTCGTTT -  
*dgpD* AGGGTTGCAAGTATCGAAGAAACGCGTACCTTTGCAAATGACTAAAAGAAT **CGATCGTTT**TAGACTAGTCGTTT -  
*dgpF* AGGGTTGCAAGTGTCGAAGAAACGCGTACCTTTGCAAATGACTAGAAAAAT **CGATCGTTT**TAGACTAGTCGTTT -  
*dgpG* AGGGTTGCAGAAGTTCGAAGAAACGCGTACCTTTGCAAATGACTAAAAGAAT **CGATCGTTT**TAGACTAGTCGTTT -  
*dgpH* AGGGTTGCAAGTATCGAAGAAACGCGTACCTTTGCAAATGACTAAAAGAAT **CGATCGTTT**TAGACTAGTCGTTT -  
*dgpI* AGGGTTGCAGGTATCAAAGAAACGCGTACCTTTGCAAATGACGAATTAATAAT **GATGGTCTAGACTAGTCGTTTT** -  
 \*\*\*\*\* \*\* \*\*\*\*\* \*\*\*\*\* \* \*\* \* \* \* \* \*\*\*\*\*
