# Supplementary material
Source: PubMed Central journal article supplement (PMC1892957)
Supplement: pnas_0608797104_6.pdf [file pnas_0608797104_6.pdf]

**Table 6. Primers used in this study (restriction sites underlined)**

| <b>Primers used to clone <i>dgp</i> genes for expression in <i>B. fragilis</i></b> |                                            |
|------------------------------------------------------------------------------------|--------------------------------------------|
| <i>dgpA</i> forward                                                                | AT <u>GGATCC</u> GGCAATCCAATAGAAGAGCTTATTA |
| <i>dgpA</i> reverse                                                                | CAGGATCCACGGAAATTCGATCAGTTTTCTAC           |
| <i>dgpC</i> forward                                                                | AC <u>GGATCC</u> TTTAATAGCAAACGACGATTTCA   |
| <i>dgpC</i> reverse                                                                | CTGGATCCGATTCTCCCATCTCTTGACCTATC           |
| <i>dgpE</i> forward                                                                | TTGGATCCAACCTTTTTCTAAACAACCCCTGTT          |
| <i>dgpE</i> reverse                                                                | GAGGATCCGAATCCCGGCGTTAGTATACAG             |
|                                                                                    |                                            |
| <b>Primers used to create His-tagged DgpA and DgpC</b>                             |                                            |
| <i>dgpA</i> forward                                                                | TTGGATCCTATGAACAAAAAGTTTTCTACGATT          |
| <i>dgpA</i> reverse                                                                | TGGATCCTTATTTAACGATTGTCTTAACAGCCTCT        |
| <i>dgpC</i> forward                                                                | GGGATCCTATGAACAAAAAGTTTTCTACTCTTTTGG       |
| <i>dgpC</i> reverse                                                                | CCGGATCCTTATTTAACAACTTTAACAGCTTCC          |
|                                                                                    |                                            |
| <b>Primers used to demonstrate promoter inversion</b>                              |                                            |
| <i>dgpB</i> forward                                                                | ACGGATGAATTATAGGTTTTAGCC                   |
| <i>dgpB</i> reverse                                                                | GTATTCAATTCATCAGCACCTGAG                   |
| <i>dgpB</i> center                                                                 | AGGTACGCGTTTCTTCGATACTT                    |
| <i>dgpC</i> forward                                                                | ATAGAGCAAGCTACTGCCGATAAT                   |
| <i>dgpC</i> reverse                                                                | GACCTTGATAGTTCCGTTATCGTT                   |
| <i>dgpC</i> center                                                                 | AAGGTACGCATTTCTTCGATACTT                   |
| <i>dgpD</i> forward                                                                | GCTCCCATTTTGATCAATTCCTAT                   |
| <i>dgpD</i> reverse                                                                | ATACTTGCAGGAATATTTGCTTGG                   |
| <i>dgpD</i> center                                                                 | TATCATTTACCAAACAAGCGATTC                   |
| <i>dgpF</i> forward                                                                | CAGCAAAGTTCGTGTGTATTTCATT                  |
| <i>dgpF</i> reverse                                                                | GTCAGCAGTCATGTTTATCTTTGC                   |
| <i>dgpF</i> center                                                                 | AGGTACGCGTTTCTTCGATACTT                    |
| <i>dgpG</i> forward                                                                | TTGTAACCCGTTTAGAACCCAGTC                   |
| <i>dgpG</i> reverse                                                                | GTACCATACAAACCGTTGATCTGA                   |
| <i>dgpG</i> center                                                                 | ACCTCTCTTTTCCTCCCTTAAAAA                   |
| <i>dgpH</i> forward                                                                | TCTCAAGTGAGTTGGTCTGTTGAT                   |
| <i>dgpH</i> reverse                                                                | AACAAATTTCCAACCAGTTCATTC                   |
| <i>dgpH</i> center                                                                 | CACCCCTTATCCTCTTTCTTATCA                   |
| <i>dgpI</i> forward                                                                | ACTTATCGGTGCATGCTCTGTG                     |
| <i>dgpI</i> reverse                                                                | GGAAACCTCAGTCTCACCTAACTC                   |
| <i>dgpI</i> center                                                                 | TCATCCCTTATTCGCTTTCTTATC                   |
|                                                                                    |                                            |

**Table 6. Primers used in this study (cont.)**

| <b>Primers used to clone <i>ssrA</i>, <i>ssrB</i>, <i>ssrC</i>, and <i>ssrD</i></b> |                                    |
|-------------------------------------------------------------------------------------|------------------------------------|
| <i>ssrA</i> forward                                                                 | TGACGGATCCACTATCAATCAATCCGTTTCCAGT |
| <i>ssrA</i> reverse                                                                 | CAAAGGATCCAAACGAGCGATAAGTCTGCTAAAC |
| <i>ssrB</i> forward                                                                 | TTTGGGATCCTAAGCCAACCGAATTAAAGTGTTT |
| <i>ssrB</i> reverse                                                                 | TTCGGGATCCACTTAGCAGAGGTGAAAGGAGCTT |
| <i>ssrC</i> forward                                                                 | TCTAGGATCCAAAGCGTTAAACATCCCATAATCT |
| <i>ssrC</i> reverse                                                                 | AGTTGGATCCTCATGATAGCTACCGGAGTATTGA |
| <i>ssrD</i> forward                                                                 | GTAAGGATCCTCTTGATAGATCCGGAAATAATG  |
| <i>ssrD</i> reverse                                                                 | TTTAGGATCCAATTTTGCGCATTTACTCGTATTT |
|                                                                                     |                                    |
| <b>Primers used to clone the promoter, IRs, and flanking regions</b>                |                                    |
| <i>dgpB</i> forward                                                                 | CATTCTGCAGCGATTCTCAAGGGCTTTAATTTAC |
| <i>dgpB</i> reverse                                                                 | TCAACTGCAGCACCAGCCAAAAGAGTAGAAAAC  |
| <i>dgpC</i> forward                                                                 | AAGACTGCAGAGTCGATTCTCTGGGAGTTAAGAA |
| <i>dgpC</i> reverse                                                                 | TCAACTGCAGCACCTGCCAAAAGAGTAGAAAAC  |
| <i>dgpF</i> forward                                                                 | AGTTCTGCAGAAGGAATATTTGTTGATTGCTTGA |
| <i>dgpF</i> reverse                                                                 | TTCCCTGCAGGTAACCTTTGCCATTTTCAACCTT |
|                                                                                     |                                    |
| <b>Primers used to demonstrate inversion of promoters by SsrA-SsrD</b>              |                                    |
| <i>dgpB</i> C1                                                                      | AGGTACGCGTTTCTTCGATACTT            |
| <i>dgpB</i> C2                                                                      | AATCGCTTGTTTCGTAAAGGATAA           |
| <i>dgpC</i> C1                                                                      | AAGGTACGCATTTCTTCGATACTT           |
| <i>dgpC</i> C2                                                                      | GTCTGGAAGGGTTGCAAGTATC             |
| <i>dgpF</i> C1                                                                      | AGGTACGCGTTTCTTCGATACTT            |
| <i>dgpF</i> C2                                                                      | GTTTGTATGGAATCGGTTGTTT             |
| C7                                                                                  | GGGGACATTGTCTCTCTTC                |
