# Supplementary material
Source: PubMed Central journal article supplement (PMC1892957)

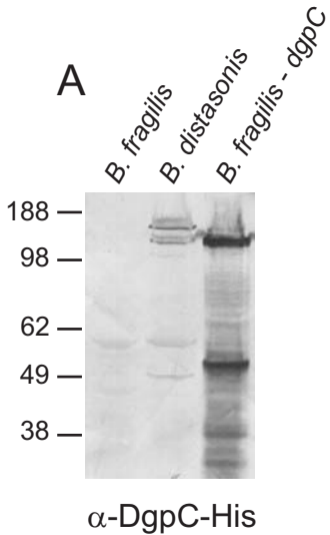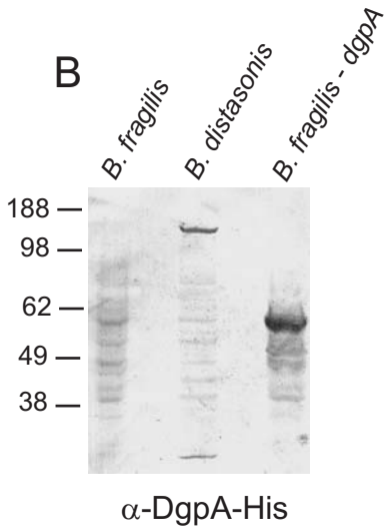

Supplement: pnas_0608797104_1.pdf [file pnas_0608797104_1.pdf]
